# Supplementary material for: Impact of sediment parameters in the prediction of benthic microbial fuel cell performance
Source: Royal Society of Chemistry journal article supplement (doi:10.1039/d0ra03459b), 2020-01-01
Supplement: d0ra03459b1.pdf [file d0ra03459b1.pdf]

## **Supplementary Information:**

# **Impact of Sediment Parameters in the Prediction of Benthic Microbial Fuel Cell Performance**

K.L. Joiner<sup>1,\*</sup>, G.L. Tukeman<sup>1,2</sup>, A.Y. Obraztsova<sup>1</sup>, and Y.M. Arias-Thode<sup>1</sup>

<sup>1</sup>Naval Information Warfare Center, San Diego, CA 92152, USA

<sup>2</sup>Center for Precision Environmental Health, Baylor College of Medicine, Houston, Texas

\*kevin.l.joiner1@navy.mil

**Supplementary Table S.1:** Locations of sediment sampling sites in San Diego Bay, La Spezia, Italy and Honolulu, Hawaii.

| <b>Location</b>  | <b>Sample</b> | <b>Description</b>         | <b>Latitude</b> | <b>Longitude</b> |
|------------------|---------------|----------------------------|-----------------|------------------|
| San Diego Bay    | Site 1        | Sweetwater Channel         | 32.64891        | -117.11285       |
|                  | Site 2        | Channel off Naval Base SD  | 32.68292        | -117.14355       |
|                  | Site 3        | South Bay                  | 32.6298         | -117.11960       |
|                  | Site 4        | Scripps Pier               | 32.70270        | -117.23268       |
|                  | Site 5        | Pier 169                   | 32.70537        | -117.23586       |
|                  | Site 6        | Fiddlers Cove              | 32.65600        | -117.14389       |
|                  | Site 7        | Glorietta Bay              | 32.67707        | -117.16527       |
|                  | SD 8          | Americas Cup Harbor        | 32.72320        | -117.22378       |
|                  | Site 9        | East Basin                 | 32.72218        | -117.17572       |
|                  | Site 10       | South of Ballist Point     | 32.68046        | -117.23316       |
|                  | Site 11       | Marine Corps Recruit Depot | 32.73880        | -117.20840       |
| La Spezia, Italy | IT 1          | Small Grid                 | 44.0959         | 9.8622           |
|                  | IT 2          | Big Grid                   | 44.0958         | 9.8620           |
| Honolulu, Hawaii | HI 1          | Waipi'o                    | 21.342664       | -157.96976       |
|                  | HI 2          | Hickam Airfield            | 21.32934        | -157.9676        |

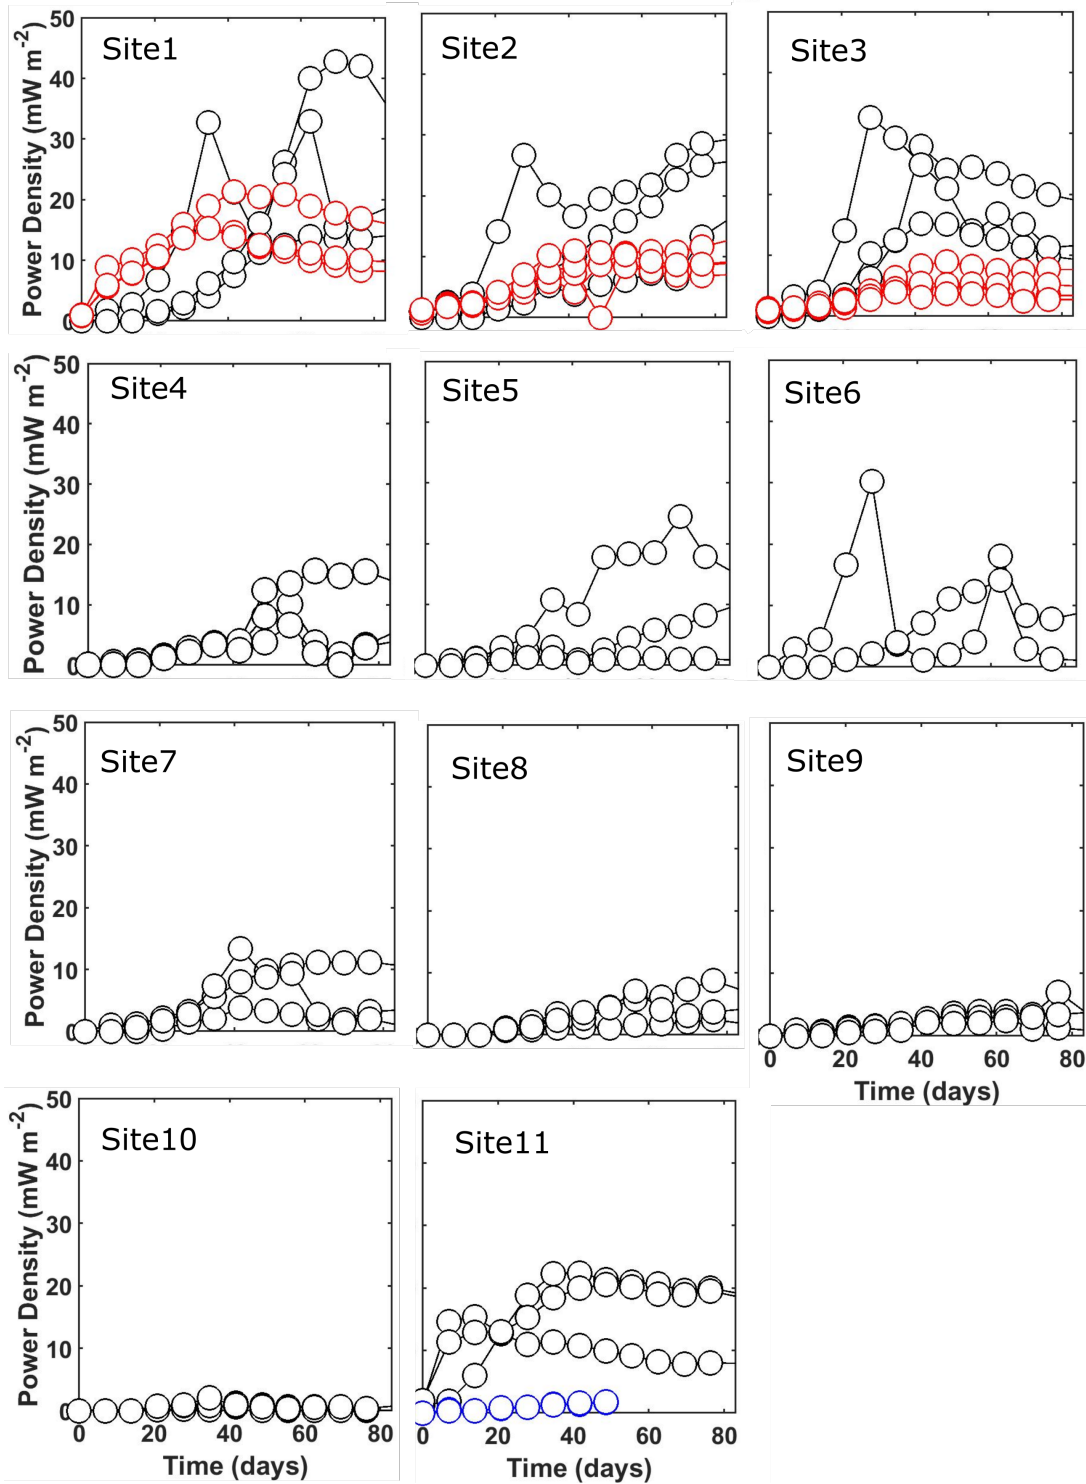

**Supplementary Figure S.1:** Power density data from the 11 sampling sites in San Diego Bay. Repeated sediment samples were taken in Aug 2014 (black), Sep 2016 (red) and Sep 2019 (blue).

**Supplementary Table S.2:** Organic geochemical data, textural analysis and average power density from the initial San Diego Bay field samples in 2014 and repeated experiments in 2015 (sites 1-3) and 2019 (site 11). Values entered as (\*) denote missing data.

| San D.Bay    | Sample  | TOC<br>(wt%) | BC<br>(wt%) | C : N | Sand<br>(wt%) | Silt & Clay<br>(wt%) | Power : $\overline{P_d}$<br>(mW m <sup>-2</sup> ) |
|--------------|---------|--------------|-------------|-------|---------------|----------------------|---------------------------------------------------|
| Initial Exp. | Site 1  | 1.75         | 0.22        | 12.1  | 12.4          | 78.2                 | 13.3                                              |
| (2014)       | Site 2  | 0.56         | 0.12        | 10.2  | 59.9          | 33.3                 | 11.4                                              |
|              | Site 3  | 1.41         | 0.20        | 9.13  | 20.6          | 82.8                 | 12.7                                              |
|              | Site 4  | 0.73         | 0.21        | 9.55  | 49.5          | 41.4                 | 4.36                                              |
|              | Site 5  | 0.40         | 0.10        | 11.0  | 65.2          | 27.1                 | 5.06                                              |
|              | Site 6  | 0.55         | 0.14        | 9.33  | 52.0          | 42.8                 | 6.36                                              |
|              | Site 7  | 1.05         | 0.18        | 10.2  | 41.8          | 53.5                 | 4.13                                              |
|              | Site 8  | 1.49         | 0.25        | 10.5  | 12.6          | 82.7                 | 2.52                                              |
|              | Site 9  | 0.60         | 0.18        | 26.0  | 40.3          | 51.6                 | 1.94                                              |
|              | Site 10 | 0.15         | 0.13        | 15.5  | 86.4          | 11.4                 | 0.38                                              |
|              | Site 11 | 1.96         | 0.25        | 15.8  | 4.15          | 94.1                 | 14.0                                              |
| Repeat Exp.  | Site 1  | 1.23         | 0.17        | 10.3  | 18.0          | 82.0                 | 11.8                                              |
| (2016)       | Site 2  | 0.68         | 0.15        | 7.30  | 47.2          | 52.8                 | 6.23                                              |
|              | Site 3  | 0.68         | 0.18        | 10.0  | 51.7          | 48.3                 | 3.89                                              |
| (2019)       | Site 11 | 1.33         | 0.31        | *     | 10.25         | 81.5                 | 0.89                                              |

**Supplementary Table S.3:** BMFC Power density regression analysis using standardized values of sediment TOC and BC. Root mean squared error: 0.191 on 8 degrees of freedom. Multiple R-squared of 0.71. F-statistic vs. constant model: 9.77, p-value < 0.05.

| <b>Regression Model: <math>\overline{P_d} \sim \text{TOC}^* + \text{BC}^*</math> (San Diego Bay 2014)</b> |          |            |         |         |
|-----------------------------------------------------------------------------------------------------------|----------|------------|---------|---------|
| Coefficients                                                                                              | Estimate | Std. Error | t-value | p-value |
| $B_{\text{TOC}}$                                                                                          | 1.55     | 0.37       | 4.18    | < 0.05  |
| $B_{\text{BC}}$                                                                                           | -1.06    | 0.37       | -2.85   | < 0.05  |

**Supplementary Table S.4:** Regression analysis using the standardized values of sediment TOC and sand. Root mean squared error: 0.41 on 9 degrees of freedom. Multiple R-squared of 0.85. F-statistic vs. constant model: 51.2, p-value < 0.05.

| <b>Regression Model: <math>\text{TOC}^* \sim \text{Sand}^*</math> (San Diego Bay 2014)</b> |          |            |         |         |
|--------------------------------------------------------------------------------------------|----------|------------|---------|---------|
| Coefficients                                                                               | Estimate | Std. Error | t-value | p-value |
| $\lambda_{\text{Sand}}$                                                                    | -0.92    | 0.13       | -7.16   | < 0.05  |

**Supplementary Table S.5:** Regression analysis using the standardized values of sediment TOC and BC. Root mean squared error: 0.54 on 9 degrees of freedom. Multiple R-squared of 0.74. F-statistic vs. constant model: 25.2, p-value < 0.05.

| <b>Regression Model: <math>\text{TOC}^* \sim \text{BC}^*</math> (San Diego Bay 2014)</b> |          |            |         |         |
|------------------------------------------------------------------------------------------|----------|------------|---------|---------|
| Coefficients                                                                             | Estimate | Std. Error | t-value | p-value |
| $\lambda_{\text{BC}}$                                                                    | 0.86     | 0.17       | 5.02    | < 0.05  |

**Supplementary Table S.6:** BMFC Power density regression analysis using standardized values of sediment TOC and BC. Root mean squared error: 0.27 on 1 degree of freedom. Multiple R-squared of 0.88. F-statistic vs. constant model: 3.71, p-value 0.35.

| <b>Regression Model: <math>\overline{P_d} \sim \text{TOC}^* + \text{BC}^*</math> (La Spezia)</b> |          |            |         |                 |
|--------------------------------------------------------------------------------------------------|----------|------------|---------|-----------------|
| Coefficients                                                                                     | Estimate | Std. Error | t-value | <i>p</i> -value |
| $B_{\text{TOC}}$                                                                                 | 0.15     | 0.31       | 0.48    | 0.71            |
| $B_{\text{BC}}$                                                                                  | -0.64    | 0.31       | -2.05   | 0.29            |

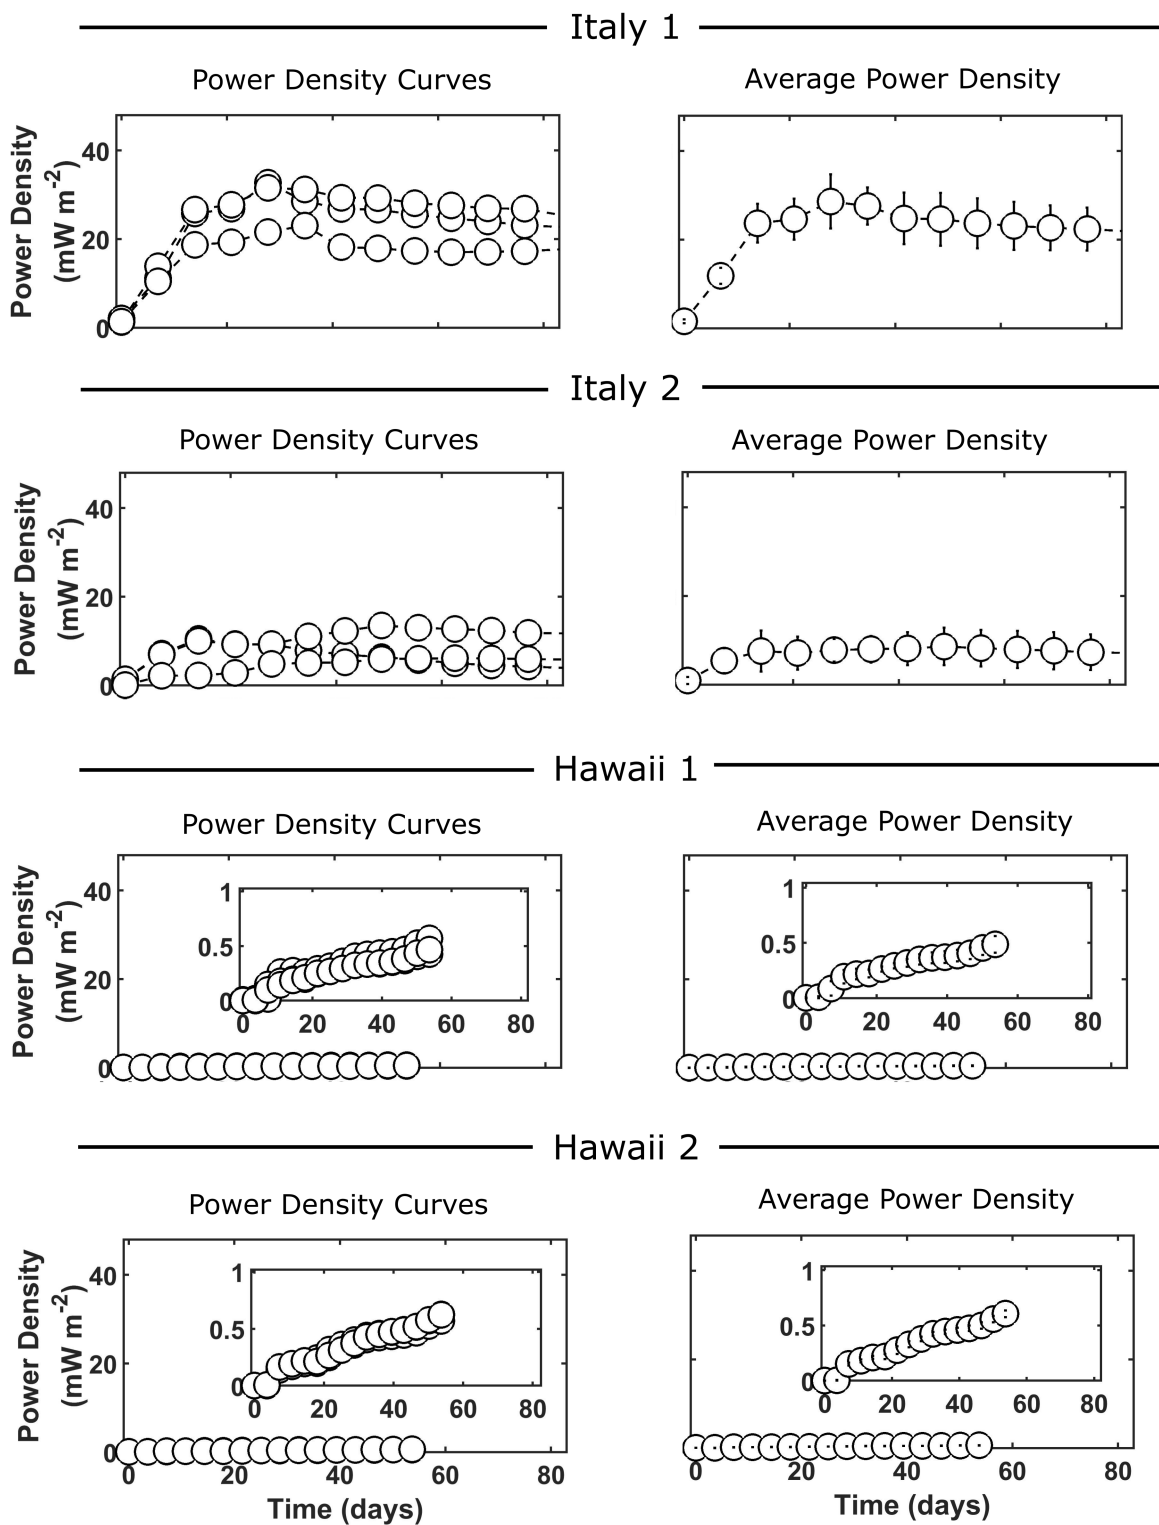

Supplementary Figure S.2: BMFC power density data from sampling sites in Italy and Hawaii in 2016.

**Supplementary Table S.7:** Organic geochemical data, textural analysis and average power density from the Italy and Hawaii field samples in 2016 and 2019.

| Sample           | TOC<br>(wt%) | BC<br>(wt%) | C : N | Sand<br>(wt%) | Silt & Clay<br>(wt%) | Power : $\overline{P_d}$<br>(mW m <sup>-2</sup> ) |
|------------------|--------------|-------------|-------|---------------|----------------------|---------------------------------------------------|
| Italy<br>(2016)  | IT 1<br>2.78 | 0.79        | 25.2  | 40.35         | 59.7                 | 21.6                                              |
|                  | IT 2<br>1.75 | 1.69        | 45.0  | 63.3          | 36.7                 | 7.04                                              |
| Hawaii<br>(2019) | HI 1<br>2.00 | 0.23        | 91.6  | 35.6          | 64.4                 | 0.26                                              |
|                  | HI 2<br>0.69 | 0.25        | 140   | 70.0          | 30.0                 | 0.31                                              |
